# Supplementary material
Source: PubMed Central journal article supplement (PMC8843069)

# THE LANCET

## Healthy Longevity

### Supplementary appendix

This appendix formed part of the original submission and has been peer reviewed. We post it as supplied by the authors.

Supplement to: Elkrief A, Hennessy C, Kuderer NM, et al. Geriatric risk factors for serious COVID-19 outcomes among older adults with cancer: a cohort study from the COVID-19 and Cancer Consortium. *Lancet Healthy Longev* 2022; published online Feb 14. [https://doi.org/10.1016/S2666-7568\(22\)00009-5](https://doi.org/10.1016/S2666-7568(22)00009-5).

**Geriatric risk factors for serious COVID-19 outcomes among older adults with cancer:  
A cohort study from the COVID-19 and Cancer Consortium**

**Supplementary Appendix**

**Alphabetical list of participants by institution that contributed at least one record to the analysis.....2**

**Methods: Definition and derivation of the geriatric risk index .....6**

**Table S1: Distribution of variables used to define the geriatric risk index among older adults with cancer and COVID-19 .....7**

**Table S2: Type of malignancy among older adults with cancer and COVID-19, stratified by geriatric risk index.....8**

**Table S3: Association of geriatric risk index (“at least” categories not consolidated) with COVID-19 severity and 30-day all-cause mortality among older adults with cancer .....9**

**Table S4: Adjusted associations of demographic and clinical factors with COVID-19 severity and 30-day all-cause mortality among older adults with cancer .....10**

**Figure S1: Adjusted associations of demographic and clinical factors with COVID-19 severity and 30-day all-cause mortality among older adults with cancer .....11**

**Figure S2: Proportion of the model’s chi-square statistic for each variable included in multivariable models for COVID-19 severity and 30-day all-cause mortality.....12**

## Alphabetical list of participants by institution that contributed at least one record to the analysis.

**Bolded** = site PI/co-PIs; site co-investigators are listed alphabetically by last name.

1. **Balazs Halmos, MD; Amit Verma, MBBS;** Benjamin A. Gartrell, MD; Sanjay Goel, MBBS; Nitin Ohri, MD; R. Alejandro Sica, MD; Astha Thakkar, MD (Albert Einstein College of Medicine, Montefiore Medical Center, Bronx, NY, USA)
2. **Keith Stockerl-Goldstein, MD;** Omar Butt, MD, PhD; Jian L. Campian, MD, PhD; Mark A. Fiala, MSW; Ryan Monahan, MBA; Alice Y. Zhou, MD, PhD (Alvin J. Siteman Cancer Center at Washington University School of Medicine and Barnes-Jewish Hospital, St. Louis, MO, USA)
3. **Michael A. Thompson, MD, PhD, FASCO;** Pamela Bohachek, RN; Daniel Mundt, MD; Mitrianna Streckfuss, MPH; Eyob Tadesse, MD (Aurora Cancer Care, Advocate Aurora Health, Milwaukee, WI, USA)
4. **Philip E. Lammers, MD, MSCI** (Baptist Cancer Center, Memphis, TN, USA)
5. **Sanjay G. Revankar, MD, FIDSA** (The Barbara Ann Karmanos Cancer Institute at Wayne State University School of Medicine, Detroit, MI, USA)
6. **Jonathan M. Loree, MD, MS, FRCPC;** Irene Yu, MD, FRCPC (BC Cancer, Vancouver, BC, Canada)
7. **Jaymin M. Patel, MD;** Andrew J. Piper-Vallillo, MD; Poorva Bindal, MBBS (Beth Israel Deaconess Medical Center, Boston, MA, USA)
8. **Orestis A. Panagiotou, MD, PhD;** Pamela C. Egan, MD; Dimitrios Farmakiotis, MD, FACP, FIDSA; Hina Khan, MD; Adam J. Olszewski, MD (Brown University and Lifespan Cancer Institute, Providence, RI, USA)
9. **Arturo Loaiza-Bonilla, MD, MEd, FACP** (Cancer Treatment Centers of America, AZ/GA/IL/OK/PA, USA)
10. **Salvatore A. Del Prete, MD;** Anne H. Angevine, MD; Michael H. Bar, MD, FACP; Anthony P. Gulati, MD; K. M. Steve Lo, MD; Jamie Stratton, MD; Paul L. Weinstein, MD (Carl & Dorothy Bennett Cancer Center at Stamford Hospital, Stamford, CT, USA)
11. **Robin A. Buerki, MD;** Jorge A. Garcia, MD, FACP (Case Comprehensive Cancer Center at Case Western Reserve University/University Hospitals, Cleveland, OH, USA)
12. **Bertrand Routy, MD, PhD** (Centre Hospitalier de l'Université de Montréal, Montreal, QC, Canada)
13. **Irma Hoyo-Ulloa, MD** (Centro Médico ABC, Ciudad de México, CDMX, Mexico)
14. **Shilpa Gupta, MD;** Nathan A. Pennell, MD, PhD, FASCO; Manmeet S. Ahluwalia, MD, FACP; Scott J. Dawsey, MD; Christopher A. Lemmon, MD; Amanda Nizam, MD (Cleveland Clinic, Cleveland, OH, USA)
15. **Claire Hoppenot, MD; Ang Li, MD, MS** (Dan L Duncan Comprehensive Cancer Center at Baylor College of Medicine, Houston, TX, USA)
16. **Toni K. Choueiri, MD;** Ziad Bakouny, MD, MSc; Jean M. Connors, MD; George D. Demetri, MD, FASCO; Dory A. Freeman, BS; Antonio Giordano, MD, PhD; Chris Labaki, MD; Alicia K. Morgans, MD, MPH; Anju Nohria, MD; Andrew L. Schmidt, MD; Eliezer M. Van Allen, MD; Pier Vitale Nuzzo, MD, PhD; Wenxin (Vincent) Xu, MD; Rebecca L. Zon, MD (Dana-Farber Cancer Institute, Boston, MA, USA)
17. **Susan Halabi, PhD, FASCO;** Tian Zhang, MD, MHS (Duke Cancer Institute at Duke University Medical Center, Durham, NC, USA)
18. **John C. Leighton Jr, MD, FACP** (Einstein Healthcare Network, Philadelphia, PA, USA)
19. **Gary H. Lyman, MD, MPH, FASCO, FRCP;** Jerome J. Graber MD, MPH; Petros Grivas, MD, PhD; Ali Raza Khaki, MD; Elizabeth T. Loggers, MD, PhD; Ryan C. Lynch, MD; Elizabeth S. Nakasone, MD, PhD; Michael T. Schweizer, MD; Lisa Tachiki, MD; Shaveta Vinayak, MD, MS; Michael J. Wagner, MD; Albert Yeh, MD (Fred Hutchinson Cancer Research Center/University of Washington/Seattle Cancer Care Alliance, Seattle, WA, USA)
20. **Na Tosha N. Gatson, MD, PhD, FAAN,** Madappa N. Kundranda, MD, PhD, FACP (Geisinger Health System, PA, USA)
21. **Sharad Goyal, MD; Minh-Phuong Huynh-Le, MD, MAS** (George Washington University, Washington, DC, USA)
22. **Stephen V. Liu, MD;** Subha Madhavan, PhD, FACMI (Georgetown Lombardi Comprehensive Cancer Center at Georgetown University, Washington, DC, USA)
23. **Lori J. Rosenstein, MD** (Gundersen Health System, WI, USA)

24. **Peter Paul Yu, MD, FACP, FASCO**; Jessica M. Clement, MD; Ahmad Daher, MD; Mark Dailey, MD; Rawad Elias, MD; Asha Jayaraj, MD; Emily Hsu, MD; Alvaro G. Menendez, MD; Joerg Rathmann, MD; Oscar Serrano, MD (Hartford HealthCare Cancer Institute, Hartford, CT, USA)
25. **Clara Hwang, MD**; Shirish M. Gadgeel, MD (Henry Ford Cancer Institute, Henry Ford Hospital, Detroit, MI, USA)
26. **Melissa K. Accordino, MD, MS**; Divaya Bhutani, MD; Jessica E. Hawley, MD; Dawn Hershman, MD, MS, FASCO; Gary K. Schwartz, MD (Herbert Irving Comprehensive Cancer Center at Columbia University, New York, NY, USA)
27. **Daniel Y. Reuben, MD, MS**; Sarah Mushtaq, MD (Hollings Cancer Center at the Medical University of South Carolina, Charleston, SC, USA)
28. **Eric H. Bernicker, MD** (Houston Methodist Cancer Center, Houston, TX, USA)
29. **John Deeken, MD**; Danielle Shafer, DO (Inova Schar Cancer Institute, Fairfax, VA, USA)
30. **Mark A. Lewis, MD; Terence D. Rhodes, MD, PhD**; David M. Gill, MD; Clarke A. Low; MD (Intermountain Health Care, Salt Lake City, UT, USA)
31. **Erika Ruiz-García, MD, MCs**; Ana Ramirez, MD; Diana Vilar-Compte, MD, MsC (Instituto Nacional de Cancerología, Mexico City, Mexico)
32. **Sandeep H. Mashru, MD**; Abdul-Hai Mansoor, MD (Kaiser Permanente Northwest, OR/WA, USA)
33. **Brandon Hayes-Lattin, MD, FACP**; Shannon McWeeney, PhD; Eneida R. Nemecek, MD, MS, MBA (Knight Cancer Institute at Oregon Health and Science University, Portland, OR, USA)
34. **Howard A. Zaren, MD, FACS**; Stephanie J. Smith, RN, MSN, OCN (Lewis Cancer & Research Pavilion @ St. Joseph's/Candler, Savannah, GA, USA)
35. **Gayathri Nagaraj, MD**; Mojtaba Akhtari, MD; Eric Lau, DO; Mark E. Reeves, MD, PhD (Loma Linda University Cancer Center, Loma Linda, CA, USA)
36. **Stephanie Berg, DO**; Destry Elms, MD (Loyola University Medical Center, Maywood, IL, USA)
37. **Firas H. Wehbe, MD, PhD**; Jessica Altman, MD; Michael Gurley, BA; Mary F. Mulcahy, MD (Lurie Cancer Center at Northwestern University, Chicago, IL, USA)
38. **Eric B. Durbin, DrPH, MS** (Markey Cancer Center at the University of Kentucky, Lexington, KY, USA)
39. **Amit A. Kulkarni, MD**; Heather H. Nelson, PhD, MPH; Surbhi Shah, MD (Masonic Cancer Center at the University of Minnesota, Minneapolis, MN, USA)
40. **Rachel P. Rosovsky, MD, MPH; Kerry Reynolds, MD**; Aditya Bardia, MD; Genevieve Boland, MD, PhD, FACS; Justin Gainor, MD; Leyre Zubiri, MD, PhD (Massachusetts General Hospital Cancer Center, Boston, MA, USA)
41. **Thorvardur R. Halfdanarson, MD**; Tanios Bekaii-Saab, MD; Aakash Desai, MD, MPH; Zhuoer Xie, MD, MS (Mayo Clinic, AZ/FL/MN, USA)
42. **Ruben A. Mesa, MD, FACP**; Mark Bonnen, MD; Daruka Mahadevan, MD, PhD; Amelie G. Ramirez, DrPH, MPH; Mary Salazar, ANP; Dimpay P. Shah, MD, PhD; Pankil K. Shah, MD, MSPH (Mays Cancer Center at UT Health San Antonio MD Anderson Cancer Center, San Antonio, TX, USA)
43. **Nathaniel Bouganim, MD, FRCP(C)**; Arielle Elkrief, MD, FRCP(C); Donald C. Vinh, MD, FRCP(C) (McGill University Health Centre, Montreal, QC, Canada)
44. **Gregory J. Riely, MD, PhD; Elizabeth V. Robilotti MD, MPH**; Rimma Belenkaya, MA, MS; John Philip, MS (Memorial Sloan Kettering Cancer Center, New York, NY, USA)
45. **Bryan A. Faller, MD** (Missouri Baptist Medical Center, St. Louis, MO, USA)
46. **Rana R. McKay, MD**; Archana Ajmera, MSN, ANP-BC, AOCNP; Angelo Cabal, BS; Justin A. Shaya, MD (Moores Comprehensive Cancer Center at the University of California, San Diego, La Jolla, CA, USA)
47. **Lisa B. Weissmann, MD**; Chinmay Jani, MD (Mount Auburn Hospital, Cambridge, MA, USA)
48. **Jeanna Knoble, MD**; (Mary) Grace Glace, RN; Cameron Rink, PhD, MBA; Karen Stauffer, RN; Rosemary Zacks, RN (Mount Carmel Health System, Columbus, OH, USA)
49. **Sibel Blau, MD** (Northwest Medical Specialties, Tacoma, WA, USA)
50. **Daniel G. Stover, MD**; Daniel Addison, MD; James L. Chen, MD; Margaret E. Gatti-Mays, MD; Sachin R. Jhawar, MD; Vidhya Karivedu, MBBS; Maryam B. Lustberg, MD, MPH; Joshua D. Palmer, MD; Clement Pillainayagam, MD; Sarah Wall, MD; Nicole Williams, MD (The Ohio State University Comprehensive Cancer Center, Columbus, OH, USA)
51. **Monika Joshi, MD, MRCP**; Harry Menon, DO, MPH; Marc A. Rovito, MD, FACP (Penn State Health/Penn State Cancer Institute/St. Joseph Cancer Center, PA, USA)
52. **Elizabeth A. Griffiths, MD**; Amro Elshoury, MBBCh (Roswell Park Comprehensive Cancer Center, Buffalo, NY, USA)

53. **Salma K. Jabbour, MD**; Mansi R. Shah, MD (Rutgers Cancer Institute of New Jersey at Rutgers Biomedical and Health Sciences, New Brunswick, NJ, USA)
54. **Gerald Batist, MD, FACP, FRCP(C)**; Erin Cook, MSN; Miriam Santos Dutra, PhD; Cristiano Ferrario, MD (Segal Cancer Centre, Jewish General Hospital, McGill University, Montreal, QC, Canada)
55. **Babar Bashir, MD, MS**; Christopher McNair, PhD; Sana Z. Mahmood, BA, BS; Vasil Mico, BS; Chaim Miller, BA; Andrea Verghese Rivera, MD (Sidney Kimmel Cancer Center at Thomas Jefferson University, Philadelphia, PA, USA)
56. **Sumit A. Shah, MD, MPH**; Elwyn C. Cabebe, MD; Michael J. Glover, MD; Alok Kumar Jha, PhD; Ali Raza Khaki, MD; Lidia Schapira, MD, FASCO; Julie Tsu-Yu Wu, MD, PhD (Stanford Cancer Institute at Stanford University, Palo Alto, CA, USA)
57. **Suki Subbiah, MD** (Stanley S. Scott Cancer Center at LSU Health Sciences Center, New Orleans, LA, USA)
58. **Daniel B. Flora, MD, PharmD**; Goetz Kloecker, MD; Barbara B. Logan, MS; Chaitanya Mandapakala, MD (St. Elizabeth Healthcare, Edgewood, KY, USA)
59. **Gilberto de Lima Lopes Jr., MD, MBA, FAMS, FASCO** (Sylvester Comprehensive Cancer Center at the University of Miami Miller School of Medicine, Miami, FL, USA)
60. **Karen Russell, MD, FACP**; Brittany Stith, RN, BSN, OCN, CCRP (Tallahassee Memorial Healthcare, Tallahassee, FL, USA)
61. **Natasha Edwin, MD**; Melissa Smits, APC (ThedaCare Cancer Care, Appleton, WI, USA)
62. **David D. Chism, MD**; Susie Owenby, RN, CCRP (Thompson Cancer Survival Center, Knoxville, TN, USA)
63. **Deborah B. Doroshov, MD, PhD**; Matthew D. Galsky, MD; Michael Wotman, MD; Huili Zhu, MD (Tisch Cancer Institute at the Icahn School of Medicine at Mount Sinai, New York, NY, USA)
64. **Julie C. Fu, MD**; Alyson Fazio, APRN-BC (Tufts Medical Center Cancer Center, Boston and Stoneham, MA, USA)
65. **Jonathan Riess, MD, MS**; Kanishka G. Patel, MD (UC Davis Comprehensive Cancer Center at the University of California at Davis, CA, USA)
66. **Vadim S. Koshkin, MD**; Daniel H. Kwon, MD (UCSF Helen Diller Family Comprehensive Cancer Center at the University of California at San Francisco, CA, USA)
67. **Samuel M. Rubinstein, MD; William A. Wood, MD, MPH**; Jessica Yasmine Islam, PhD, MPH; Vaibhav Kumar, MD (UNC Lineberger Comprehensive Cancer Center, Chapel Hill, NC, USA)
68. **Trisha M. Wise-Draper, MD, PhD**; Syed Ahmad, MD; Punita Grover, MD; Shuchi Gulati, MD; Jordan Kharofa, MD; Michelle Marcum, MS; Cathleen Park, MD (University of Cincinnati Cancer Center, Cincinnati, OH, USA)
69. **Daniel W. Bowles, MD**; Christopher L. Geiger, MD (University of Colorado Cancer Center, Aurora, CO, USA)
70. **Merry-Jennifer Markham, MD, FACP, FASCO**; Rohit Bishnoi, MD; Chintan Shah, MD (University of Florida Health Cancer Center, Gainesville, FL, USA)
71. **Jared D. Acoba, MD**; Young Soo Rho, MD, CM (University of Hawai'i Cancer Center, Honolulu, HI, USA)
72. **Lawrence E. Feldman, MD; Kent F. Hoskins, MD**; Gerald Gantt Jr., MD; Mahir Khan, MD; Ryan H. Nguyen, DO; Mary Pasquinelli, APN, DNP; Candice Schwartz, MD; Neeta K. Venepalli, MD, MBA (University of Illinois Hospital & Health Sciences System, Chicago, IL, USA)
73. **Praveen Vikas, MD** (University of Iowa Holden Comprehensive Cancer Center, Iowa City, IA, USA)
74. **Elizabeth Wulff-Burchfield, MD**; Anup Kasi MD, MPH (The University of Kansas Cancer Center, Kansas City, KS, USA)
75. **Christopher R. Friese, PhD, RN, AOCN, FAAN; Leslie A. Fecher, MD** (University of Michigan Rogel Cancer Center, Ann Arbor, MI, USA)
76. **Blanche H. Mavromatis, MD**; Ragneel Bijjula, MD; Qamar U. Zaman, MD (UPMC Western Maryland, Cumberland, MD, USA)
77. **Jeremy L. Warner, MD, MS, FAMIA, FASCO**; Alaina J. Brown, MD, MPH; Alicia Beeghly-Fadiel, PhD; Alex Cheng, PhD; Sarah Croessmann, PhD; Elizabeth J. Davis, MD; Stephany N. Duda, PhD, MS; Kyle T. Enriquez, MSc BS; Benjamin French, PhD; Erin A. Gillaspie, MD, MPH; Daniel Hausrath, MD; Cassandra Hennessy, MS; Chih-Yuan Hsu, PhD; Douglas B. Johnson, MD, MSCI; Xuanyi Li, MD; Sanjay Mishra, MS, PhD; Sonya A. Reid, MD, MPH; Brian I. Rini, MD, FACP, FASCO; Yu Shyr, PhD; David A. Slosky, MD; Carmen C. Solorzano, MD, FACS; Tianyi Sun, MS; Matthew D. Tucker, MD; Karen Vega-

- Luna, MA; Lucy L. Wang, BA (Vanderbilt-Ingram Cancer Center at Vanderbilt University Medical Center, Nashville, TN, USA)
78. **Hagen F. Kennecke, MD, MHA, FRCPC**; David M. Aboulafia, MD; Brett A. Schroeder, MD (Virginia Mason Cancer Institute, Seattle, WA, USA)
  79. **Matthew Puc, MD**; Theresa M. Carducci, MSN, RN, CCRP; Karen J. Goldsmith, BSN, RN; Susan Van Loon, RN, CTR, CCRP (Virtua Health, Marlton, NJ, USA)
  80. **Umit Topaloglu, PhD, FAMIA**; Saif I. Alimohamed, MD (Wake Forest Baptist Comprehensive Cancer Center, Winston-Salem, NC, USA)
  81. **Robert L. Rice, MD, PhD** (WellSpan Health, York, PA, USA)
  82. **Wilhelmina D. Cabalona, MD**; Christine Pilar, BS, CCRC, ACRP-PM (Wentworth-Douglass Hospital, Dover, NH, USA)
  83. **Prakash Peddi, MD; Lane R. Rosen, MD**; Briana Barrow McCollough, BSc, CCRC (Willis-Knighton Cancer Center, Shreveport, LA, USA)
  84. **Mehmet A. Bilen, MD**; Deepak Ravindranathan, MD, MS (Winship Cancer Institute of Emory University, Atlanta, GA, USA)
  85. **Navid Hafez, MD, MPH**; Roy Herbst, MD, PhD; Patricia LoRusso, DO, PhD; Tyler Masters, MS; Catherine Stratton, BA (Yale Cancer Center at Yale University School of Medicine, New Haven, CT, USA)

## Methods: Definition and derivation of the geriatric risk index.

In this section, we provide the definition and derivation of the geriatric risk index. First, we defined a modified Charlson comorbidity index (CCI) according to:

| Variable                                                                                               | Score |
|--------------------------------------------------------------------------------------------------------|-------|
| Coronary artery disease                                                                                | 1     |
| Congestive heart failure                                                                               | 1     |
| Peripheral vascular disease                                                                            | 1     |
| Cerebrovascular accident or stroke                                                                     | 1     |
| Chronic obstructive pulmonary disorder or emphysema                                                    | 1     |
| Dementia                                                                                               | 1     |
| Diabetes mellitus                                                                                      | 1     |
| Diabetes mellitus and/or end stage renal disease, peripheral vascular disease, coronary artery disease | 2     |
| Chronic renal insufficiency                                                                            | 2     |
| End stage renal disease, with or without dialysis                                                      | 2     |
| Liver disease not otherwise specified                                                                  | 1     |
| Cirrhosis                                                                                              | 3     |
| Rheumatologic or autoimmune disease                                                                    | 1     |
| HIV/AIDS and CD4 count <200 mm <sup>3</sup>                                                            | 6     |

Next, we calculated the geriatric risk index based on age, modified CCI, and Eastern Cooperative Oncology Group (ECOG) performance status: age ( $\leq 75$  years, 0 points; 76–80 years, 1 point;  $>80$  years, 2 points); modified CCI (0, 0 points; 1 or 2, 1 point;  $>2$ , 2 points); and ECOG performance status (0, 0 points; 1, 1 point;  $>2$ , 2 points). Patients were categorized as standard risk (0 or 1 point), intermediate risk (2 or 3 points), or high risk (4–6 points).

To include patients with partially missing data and to maximize use of the available data, all patients had a geriatric risk index point total calculated. Patients with unknown ECOG performance status were initially categorized separately based on the available data and denoted as belonging to “at least” that category, recognizing that their level of risk may be underestimated. If ECOG performance was unknown and:

- Age  $\leq 75$  years and modified CCI = 0, then geriatric risk index = “at least standard risk”
- Age 76–80 years and modified CCI = 0, then geriatric risk index = “at least standard risk”
- Age  $>80$  years and modified CCI = 0, then geriatric risk index = “at least intermediate risk”
- Age  $\leq 75$  years and modified CCI = 1 or 2, then geriatric risk index = “at least standard risk”
- Age 76–80 years and modified CCI = 1 or 2, then geriatric risk index = “at least intermediate risk”
- Age  $>80$  years and modified CCI = 1 or 2, then geriatric risk index = “at least intermediate risk”
- Age  $\leq 75$  years and modified CCI  $>2$ , then geriatric risk index = “at least intermediate risk”
- Age 76–80 years and modified CCI  $>2$ , then geriatric risk index = “at least intermediate risk”
- Age  $>80$  years and modified CCI  $>2$ , then geriatric risk index = “high risk”

For simplicity of clinical application and given similarity to the adjacent groups, these “at least” categories were consolidated (i.e., “at least standard risk” was consolidated with “standard risk” and “at least intermediate risk” was consolidated with “intermediate risk”).

**Table S1: Distribution of variables used to define the geriatric risk index among older adults with cancer and COVID-19.**

|                                                       | Standard risk<br>(n = 2365) | Intermediate risk<br>(n = 2217) | High risk<br>(n = 1089) |
|-------------------------------------------------------|-----------------------------|---------------------------------|-------------------------|
| Median age, years                                     | 67 (63–72)                  | 73 (67–79)                      | 83 (78–87)              |
| 60–69                                                 | 1516 (64%)                  | 750 (34%)                       | 70 (6%)                 |
| 70–79                                                 | 822 (35%)                   | 949 (43%)                       | 268 (25%)               |
| ≥80                                                   | 27 (1%)                     | 518 (23%)                       | 751 (69%)               |
| Median Charlson comorbidity index                     | 0 (0–1)                     | 1 (1–3)                         | 3 (1–4)                 |
| 0                                                     | 1581 (67%)                  | 426 (19%)                       | 52 (5%)                 |
| 1 or 2                                                | 784 (33%)                   | 1135 (51%)                      | 373 (34%)               |
| ≥3                                                    | 0 (0%)                      | 646 (29%)                       | 664 (61%)               |
| Missing/unknown                                       | 0 (0%)                      | 9 (<1%)                         | 0 (0%)                  |
| Eastern Cooperative Oncology Group performance status |                             |                                 |                         |
| 0                                                     | 1113 (47%)                  | 344 (16%)                       | 29 (3%)                 |
| 1                                                     | 371 (16%)                   | 871 (39%)                       | 278 (26%)               |
| ≥2                                                    | 0 (0%)                      | 356 (16%)                       | 657 (60%)               |
| Unknown                                               | 881 (37%)                   | 644 (29%)                       | 125 (11%)               |
| Missing                                               | 0 (0%)                      | 2 (<1%)                         | 0 (0%)                  |

Data are n (%) or median (interquartile range).



**Table S2: Type of malignancy among older adults with cancer and COVID-19, stratified by geriatric risk index.**

|                         | Standard risk<br>(n = 2365) | Intermediate risk<br>(n = 2217) | High risk<br>(n = 1089) |
|-------------------------|-----------------------------|---------------------------------|-------------------------|
| Solid tumor             |                             |                                 |                         |
| Breast                  | 480 (20%)                   | 359 (16%)                       | 179 (16%)               |
| Prostate                | 442 (19%)                   | 400 (18%)                       | 230 (21%)               |
| Gastrointestinal        | 267 (11%)                   | 384 (17%)                       | 172 (16%)               |
| Other genitourinary     | 181 (8%)                    | 195 (9%)                        | 117 (11%)               |
| Thoracic                | 200 (8%)                    | 289 (13%)                       | 143 (13%)               |
| Gynecological           | 169 (7%)                    | 152 (7%)                        | 56 (5%)                 |
| Endocrine               | 100 (4%)                    | 73 (3%)                         | 25 (2%)                 |
| Skin cancer             | 76 (3%)                     | 87 (4%)                         | 43 (4%)                 |
| Head and neck           | 78 (3%)                     | 87 (4%)                         | 32 (3%)                 |
| Sarcoma                 | 53 (2%)                     | 31 (1%)                         | 11 (1%)                 |
| Nervous system          | 25 (1%)                     | 29 (1%)                         | 7 (1%)                  |
| Not otherwise specified | 18 (1%)                     | 15 (1%)                         | 14 (1%)                 |
| Hematological neoplasm  |                             |                                 |                         |
| Lymphoid neoplasms      | 321 (14%)                   | 246 (11%)                       | 127 (12%)               |
| Multiple myeloma        | 123 (5%)                    | 124 (6%)                        | 63 (6%)                 |
| Myeloid neoplasm        | 89 (4%)                     | 111 (5%)                        | 68 (6%)                 |
| Not otherwise specified | 4 (<1%)                     | 4 (<1%)                         | 3 (<1%)                 |

Data are n (%). Categories are not mutually exclusive.

**Table S3: Association of geriatric risk index (“at least” categories not consolidated) with COVID-19 severity and 30-day all-cause mortality among older adults with cancer.**

| Geriatric risk index       | COVID-19 severity   | 30-day mortality    |
|----------------------------|---------------------|---------------------|
| Standard risk              | Reference           | Reference           |
| At least standard risk     | 1.56 (1.32 to 1.85) | 1.58 (1.14 to 2.20) |
| Intermediate risk          | 3.14 (2.72 to 3.62) | 4.19 (3.23 to 5.42) |
| At least intermediate risk | 3.47 (2.88 to 4.17) | 5.14 (3.80 to 6.94) |
| High risk                  | 9.30 (7.88 to 11.0) | 13.2 (10.1 to 17.1) |

Data are odds ratio (95% confidence interval).

**Table S4: Adjusted associations of demographic and clinical factors with COVID-19 severity and 30-day all-cause mortality among older adults with cancer.**

|                                                                           | COVID-19 severity*  | 30-day mortality†   |
|---------------------------------------------------------------------------|---------------------|---------------------|
| Age, per decade                                                           | 1.55 (1.44 to 1.66) | 2.08 (1.87 to 2.32) |
| Sex, male vs. female                                                      | 1.45 (1.30 to 1.62) | 1.76 (1.48 to 2.09) |
| Race and ethnicity                                                        |                     |                     |
| Non-Hispanic Black vs. non-Hispanic White                                 | 1.31 (1.14 to 1.52) | 1.39 (1.12 to 1.73) |
| Hispanic vs. non-Hispanic White                                           | 1.45 (1.20 to 1.74) | 1.58 (1.18 to 2.10) |
| Other vs. non-Hispanic White                                              | 1.28 (1.06 to 1.55) | 1.16 (0.85 to 1.57) |
| Smoking status, ever vs. never                                            | 1.28 (1.15 to 1.43) | 1.33 (1.11 to 1.59) |
| Obesity, yes vs. no                                                       | 1.12 (1.00 to 1.26) | 1.04 (0.86 to 1.25) |
| Dementia, yes vs. no                                                      | 1.65 (1.25 to 2.17) | 1.35 (0.97 to 1.89) |
| Charlson comorbidity index                                                |                     |                     |
| 1 or 2 vs. 0                                                              | 1.77 (1.55 to 2.00) | 1.85 (1.49 to 2.30) |
| ≥3 vs. 0                                                                  | 2.48 (2.13 to 2.88) | 2.24 (1.76 to 2.84) |
| Eastern Cooperative Oncology Group performance status                     |                     |                     |
| 1 vs. 0                                                                   | 1.59 (1.37 to 1.85) | 1.97 (1.49 to 2.59) |
| ≥2 vs. 0                                                                  | 4.60 (3.84 to 5.50) | 6.42 (4.86 to 8.48) |
| Unknown vs. 0                                                             | 2.08 (1.79 to 2.41) | 3.08 (2.34 to 4.05) |
| Type of malignancy                                                        |                     |                     |
| Hematological neoplasm vs. solid cancer                                   | 2.06 (1.75 to 2.42) | 1.87 (1.46 to 2.40) |
| Multiple‡ vs. solid cancer                                                | 1.45 (1.24 to 1.69) | 1.37 (1.09 to 1.73) |
| Cancer status                                                             |                     |                     |
| Active and responding vs. remission or no evidence of disease             | 1.09 (0.89 to 1.35) | 1.19 (0.84 to 1.68) |
| Active and stable vs. remission or no evidence of disease                 | 1.10 (0.93 to 1.31) | 1.36 (1.03 to 1.78) |
| Active and progressing vs. remission or no evidence of disease            | 3.48 (2.86 to 4.23) | 5.15 (3.93 to 6.74) |
| Unknown vs. remission or no evidence of disease                           | 2.10 (1.67 to 2.63) | 3.26 (2.37 to 4.47) |
| Recent cytotoxic chemotherapy vs. no recent cytotoxic chemotherapy§       | 1.38 (1.16 to 1.64) | 1.49 (1.16 to 1.91) |
| Recent targeted therapy vs. no recent targeted therapy§                   | 1.17 (0.97 to 1.42) | 0.96 (0.72 to 1.29) |
| Recent endocrine therapy vs. no recent endocrine therapy§                 | 0.85 (0.69 to 1.03) | 0.74 (0.54 to 1.02) |
| Recent immunotherapy vs. no recent immunotherapy§                         | 1.19 (0.92 to 1.54) | 1.10 (0.76 to 1.60) |
| Recent locoregional therapy vs. no recent locoregional therapy§           | 1.10 (0.90 to 1.35) | 1.22 (0.90 to 1.66) |
| Other recent anti-cancer therapy vs. no other recent anti-cancer therapy§ | 1.10 (0.70 to 1.73) | 1.12 (0.55 to 2.25) |
| No anti-cancer therapy, ever vs. >3 months before COVID-19 diagnosis      | 0.95 (0.75 to 1.20) | 0.88 (0.62 to 1.24) |
| Country of residence, outside US vs. US                                   | 0.98 (0.74 to 1.29) | 0.72 (0.47 to 1.11) |
| Month of COVID-19 diagnosis                                               |                     |                     |
| May–Aug 2020 vs. Jan–Apr 2020                                             | 0.47 (0.41 to 0.53) | 0.35 (0.29 to 0.43) |
| Sep–Dec 2020 vs. Jan–Apr 2020                                             | 0.30 (0.25 to 0.35) | 0.25 (0.19 to 0.33) |
| Jan–Apr 2021 vs. Jan–Apr 2020                                             | 0.52 (0.44 to 0.62) | 0.36 (0.27 to 0.48) |
| May–Jun 2021 vs. Jan–Apr 2020                                             | 1.64 (0.87 to 3.08) | 0.33 (0.08 to 1.25) |

Data are odds ratio (95% confidence interval).

\* Six-level ordinal scale based on a patient's most severe reported disease status. Odds ratios greater than 1 indicate higher COVID-19 severity. Adjusted for all variables listed.

† Odds ratios greater than 1 indicate higher odds of 30-day all-cause mortality. Adjusted for all variables listed.

‡ Includes two or more solid tumors or hematological neoplasms.

§ Within 3 months prior to COVID-19 diagnosis.

**Figure S1: Adjusted associations of demographic and clinical factors with COVID-19 severity and 30-day all-cause mortality among older adults with cancer.**

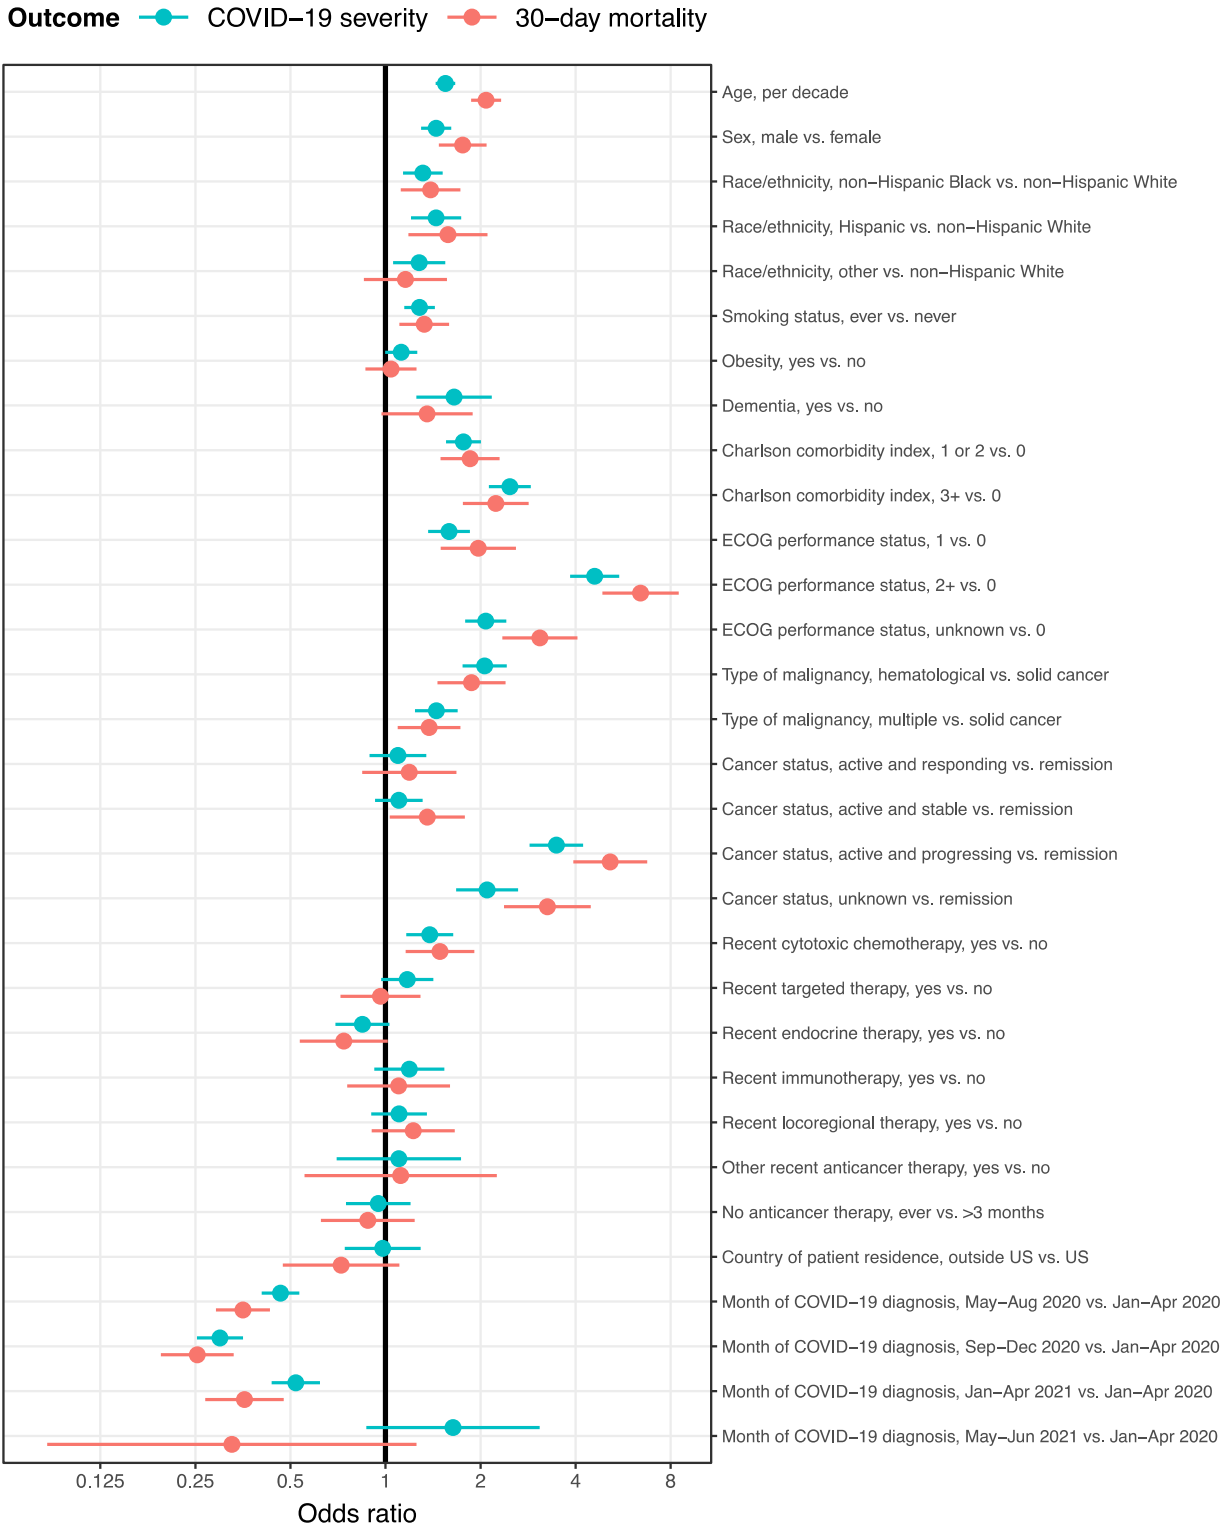

Figure S2: Proportion of the model's chi-square statistic for each variable included in multivariable models for COVID-19 severity and 30-day all-cause mortality.

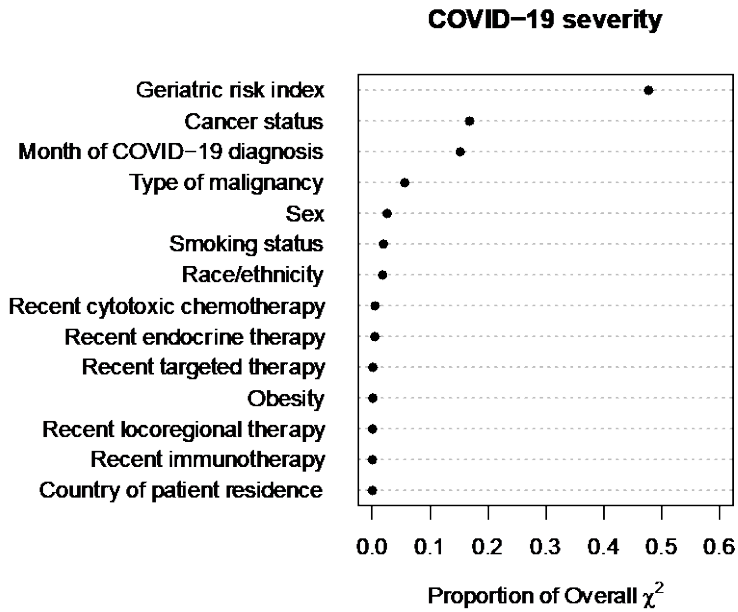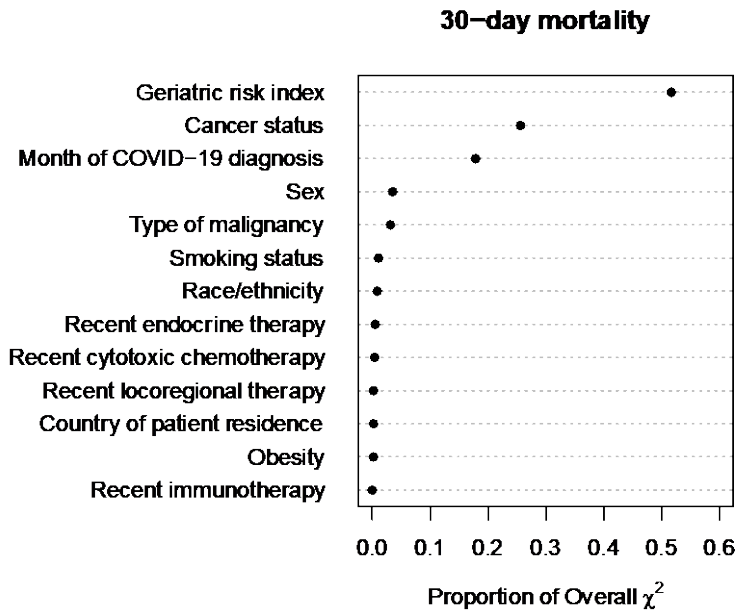

Supplement: mmc1.pdf [file mmc1.pdf]
